# Supplementary material for: Synergetic EGCG and coenzyme Q10 DSPC liposome nanoparticles protect against myocardial infarction
Source: Royal Society of Chemistry journal article supplement (doi:10.1039/d3bm00857f), 2023-01-01
Supplement: d3bm00857f1.pdf [file d3bm00857f1.pdf]

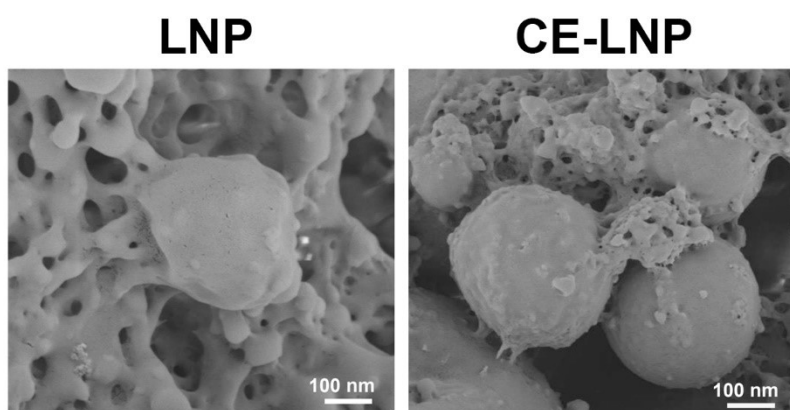

Figure S1 The SEM images of LNP and CE-LNP in PBS.

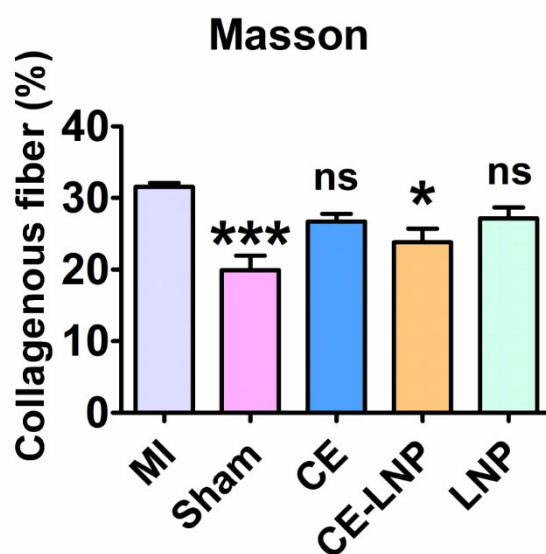

Figure S2 Quantitative results of collagen fibers from Masson staining. \* $P < 0.01$ , \*\*\* $P < 0.001$  vs MI group. ns, no statistical significance vs MI group.
